# Supplementary material for: Synergistic AHR Binding Pathway with EMT Effects on Serous Ovarian Tumors Recognized by Multidisciplinary Integrated Analysis
Source: MDPI journal article supplement (doi:10.3390/biomedicines9080866), 2021-07-22
Supplement: s1 [file s1]

**Table S2.** Sensitivity, specificity, and accuracy of binary classification and prediction by supervised machine learning

| Gene set                      | Classification | Groups                             | Sensitivity<br>(SD <sup>1</sup> ) | Specificity<br>(SD <sup>1</sup> ) | Accuracy (SD <sup>1</sup> ) | AUC <sup>2</sup> |
|-------------------------------|----------------|------------------------------------|-----------------------------------|-----------------------------------|-----------------------------|------------------|
| Gene<br>Ontology<br>resources | Binary         | Serous BOT <sup>3</sup>            | 0.9933 (0.0211)                   | 1.0000 (0.0000)                   | 0.9977 (0.0073)             | 0.9967           |
|                               |                | Serous ovarian carcinoma stage I   | 0.9575 (0.0567)                   | 1.0000 (0.0000)                   | 0.9930 (0.0091)             | 0.9794           |
|                               |                | Serous ovarian carcinoma stage II  | 0.9513 (0.0587)                   | 1.0000 (0.0000)                   | 0.9897 (0.0121)             | 0.9771           |
|                               |                | Serous ovarian carcinoma stage III | 1.0000 (0.0000)                   | 0.9985 (0.0049)                   | 0.9998 (0.0008)             | 0.9993           |
|                               |                | Serous ovarian carcinoma stage IV  | 1.0000 (0.0000)                   | 1.0000 (0.0000)                   | 1.0000 (0.0000)             | 1.0000           |

<sup>1</sup> SD, standard deviation; <sup>2</sup> AUC, area under the curve; <sup>3</sup> BOT, borderline ovarian tumor.
