# Supplementary material for: Synergistic AHR Binding Pathway with EMT Effects on Serous Ovarian Tumors Recognized by Multidisciplinary Integrated Analysis
Source: MDPI journal article supplement (doi:10.3390/biomedicines9080866), 2021-07-22
Supplement: s1 [file s1]

**Table S4.** The top 25 common dysregulated GO terms among the five case groups (serous BOT and all stages of serous ovarian carcinoma)

| Order | GO ID      | GO term                                     | Original<br>ranking in<br>serous BOT | Original<br>ranking in<br>serous ovarian<br>carcinoma,<br>FIGO stage I | Original<br>ranking in<br>serous ovarian<br>carcinoma,<br>FIGO stage II | Original<br>ranking in<br>serous ovarian<br>carcinoma,<br>FIGO stage III | Original<br>ranking in<br>serous ovarian<br>carcinoma,<br>FIGO stage IV |
|-------|------------|---------------------------------------------|--------------------------------------|------------------------------------------------------------------------|-------------------------------------------------------------------------|--------------------------------------------------------------------------|-------------------------------------------------------------------------|
| 1     | GO:0044281 | Small molecule metabolic process            | 5                                    | 2                                                                      | 1                                                                       | 2                                                                        | 1                                                                       |
| 2     | GO:0005215 | Transporter activity                        | 2                                    | 1                                                                      | 2                                                                       | 3                                                                        | 3                                                                       |
| 3     | GO:0006811 | Ion transport                               | 4                                    | 3                                                                      | 4                                                                       | 6                                                                        | 5                                                                       |
| 4     | GO:0051049 | Regulation of transport                     | 6                                    | 5                                                                      | 6                                                                       | 5                                                                        | 4                                                                       |
| 5     | GO:0006629 | Lipid metabolic process                     | 12                                   | 4                                                                      | 5                                                                       | 9                                                                        | 6                                                                       |
| 6     | GO:0045595 | Regulation of cell differentiation          | 8                                    | 9                                                                      | 10                                                                      | 8                                                                        | 9                                                                       |
| 7     | GO:0007267 | Cell-cell signaling                         | 23                                   | 6                                                                      | 8                                                                       | 14                                                                       | 10                                                                      |
| 8     | GO:0040011 | Locomotion                                  | 27                                   | 8                                                                      | 12                                                                      | 10                                                                       | 13                                                                      |
| 9     | GO:0042592 | Homeostatic process                         | 14                                   | 10                                                                     | 13                                                                      | 19                                                                       | 14                                                                      |
| 10    | GO:0002520 | Immune system development                   | 8                                    | 23                                                                     | 22                                                                      | 17                                                                       | 16                                                                      |
| 11    | GO:0022008 | Neurogenesis                                | 38                                   | 14                                                                     | 14                                                                      | 13                                                                       | 11                                                                      |
| 12    | GO:0048585 | Negative regulation of response to stimulus | 13                                   | 17                                                                     | 17                                                                      | 26                                                                       | 21                                                                      |
| 13    | GO:0031399 | Regulation of protein modification process  | 11                                   | 16                                                                     | 24                                                                      | 24                                                                       | 24                                                                      |
| 14    | GO:0007049 | Cell cycle                                  | 24                                   | 22                                                                     | 15                                                                      | 20                                                                       | 19                                                                      |
| 15    | GO:0051174 | Regulation of phosphorus metabolic process  | 21                                   | 12                                                                     | 18                                                                      | 29                                                                       | 23                                                                      |
| 16    | GO:0055085 | Transmembrane transport                     | 16                                   | 10                                                                     | 21                                                                      | 32                                                                       | 34                                                                      |

|    |            |                                                                |    |    |    |    |    |
|----|------------|----------------------------------------------------------------|----|----|----|----|----|
| 17 | GO:0070727 | Cellular macromolecule localization                            | 25 | 19 | 26 | 16 | 29 |
| 18 | GO:0019219 | Regulation of nucleobase-containing compound metabolic process | 31 | 29 | 20 | 22 | 15 |
| 19 | GO:0033043 | Regulation of organelle organization                           | 28 | 28 | 19 | 23 | 25 |
| 20 | GO:0051240 | Positive regulation of multicellular organismal process        | 17 | 30 | 35 | 21 | 28 |
| 21 | GO:0023056 | Positive regulation of signaling                               | 30 | 21 | 27 | 30 | 35 |
| 22 | GO:0046907 | Intracellular transport                                        | 29 | 31 | 37 | 27 | 37 |
| 23 | GO:0022610 | Biological adhesion                                            | 15 | 32 | 38 | 38 | 42 |
| 24 | GO:0098772 | Molecular function regulator                                   | 36 | 15 | 31 | 45 | 40 |
| 25 | GO:0000003 | Reproduction                                                   | 49 | 26 | 39 | 33 | 30 |
